# Supplementary material
Source: PubMed Central journal article supplement (PMC2040469)

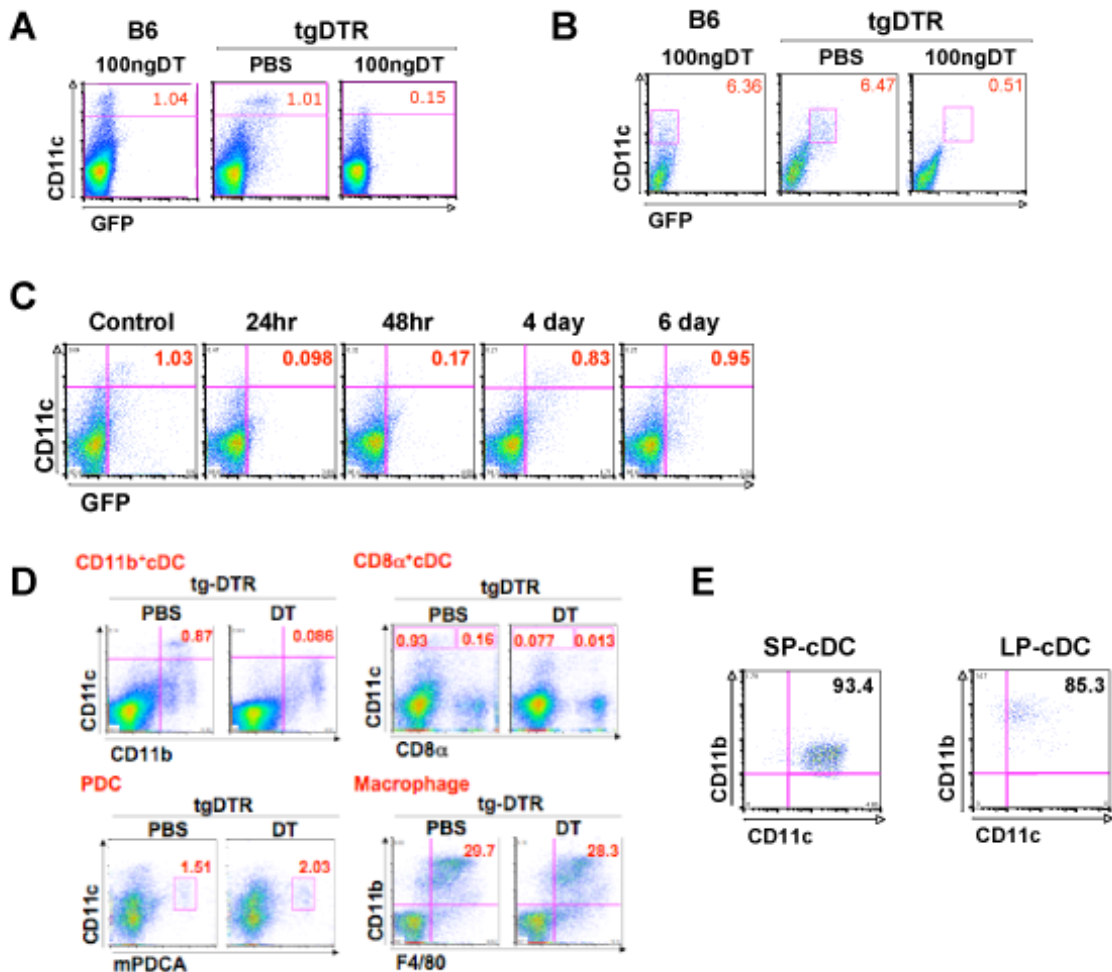

Supplement: pnas_0708469104_1.pdf [file pnas_0708469104_1.pdf]

**A**

B6

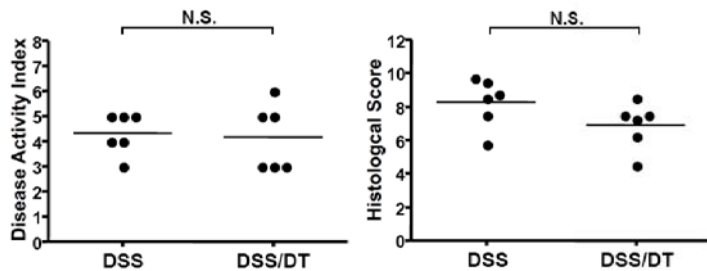**B**tg-DTR / RAG<sup>-/-</sup>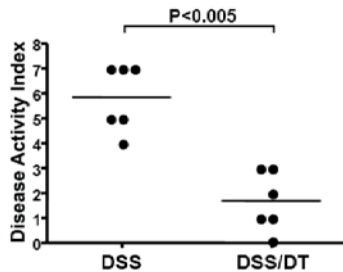**C**tg-DTR / RAG<sup>-/-</sup>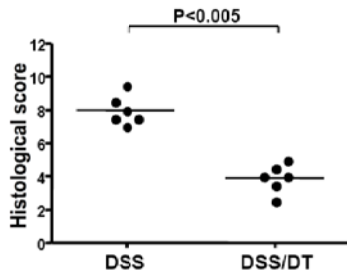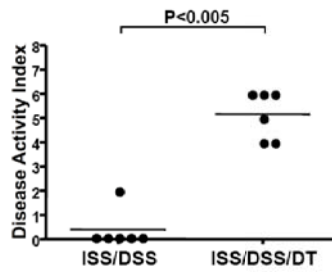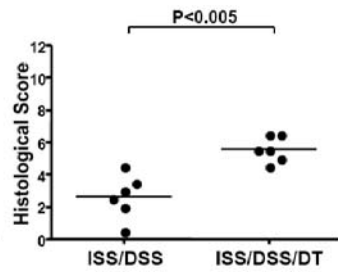

Supplement: pnas_0708469104_2.pdf [file pnas_0708469104_2.pdf]

**A**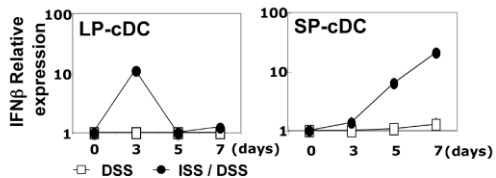**D**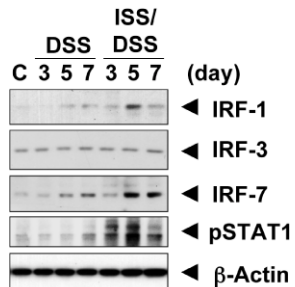**B**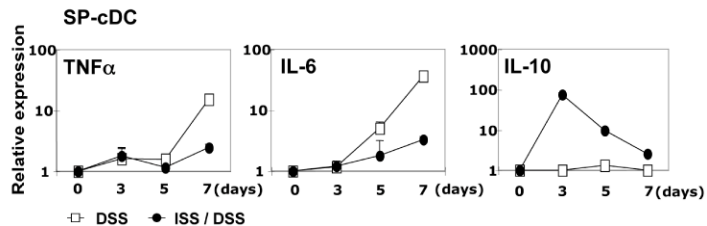**C**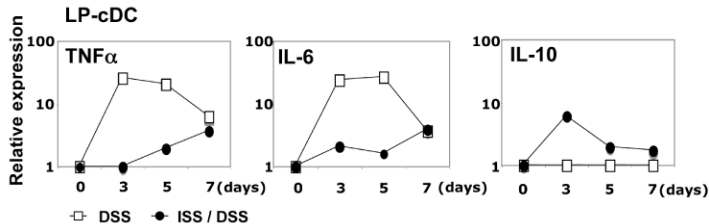

Supplement: pnas_0708469104_3.pdf [file pnas_0708469104_3.pdf]

**A**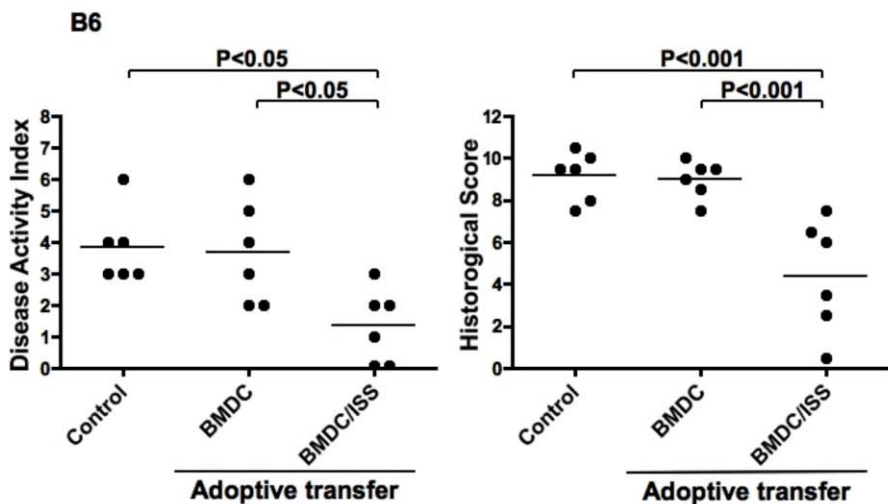**B**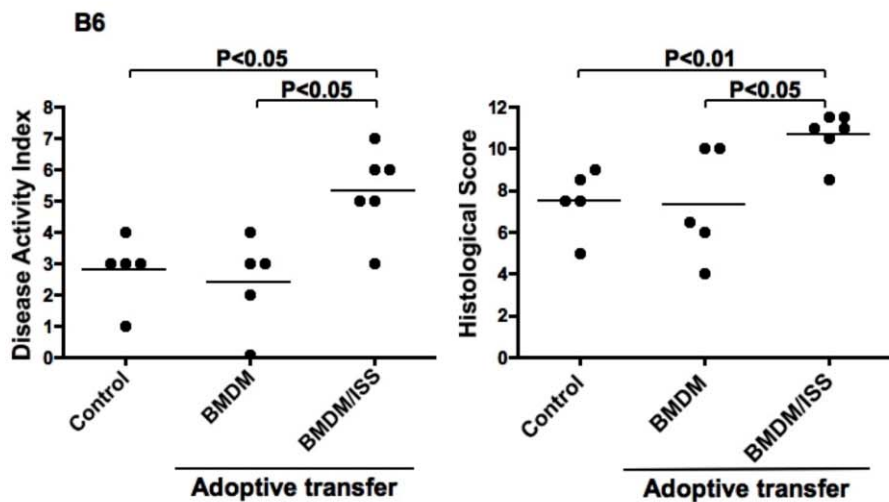

Supplement: pnas_0708469104_4.pdf [file pnas_0708469104_4.pdf]

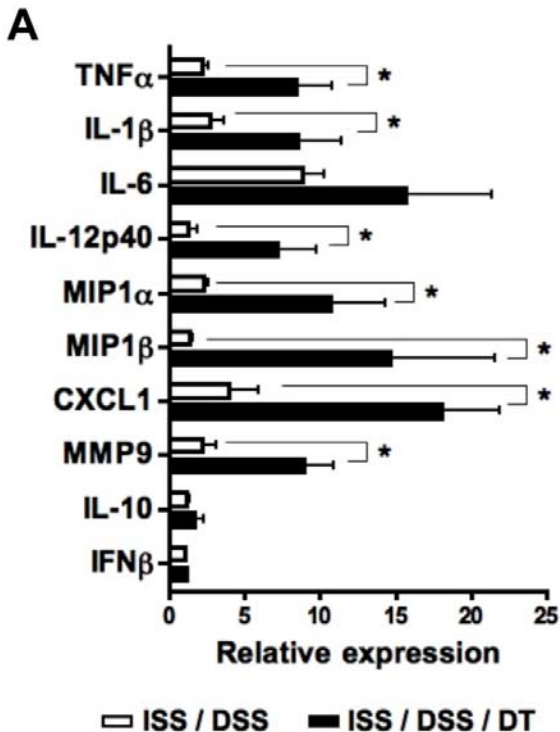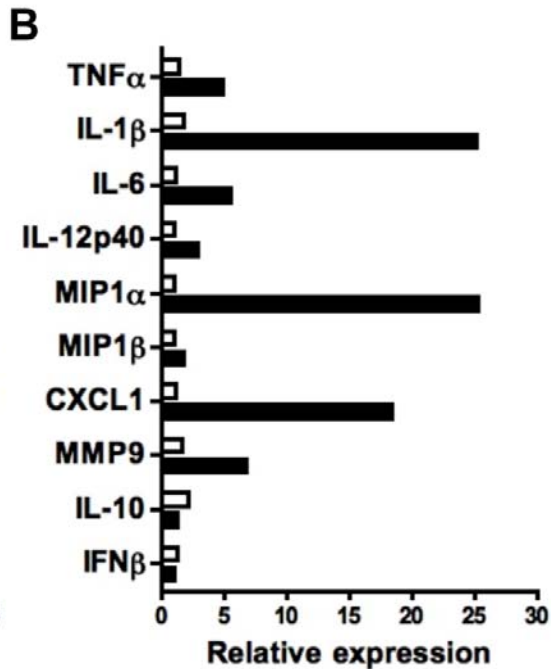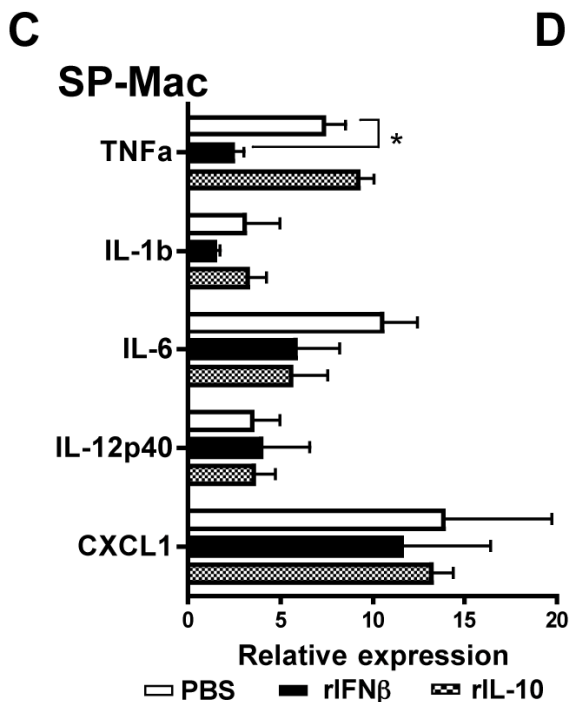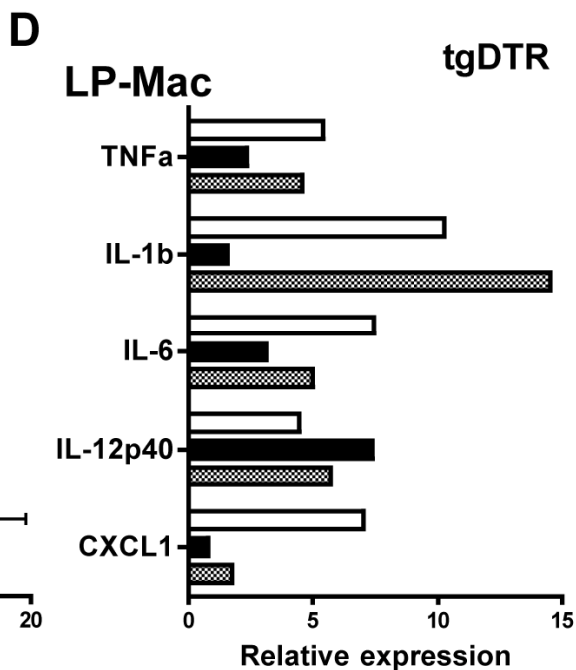

Supplement: pnas_0708469104_5.pdf [file pnas_0708469104_5.pdf]
